# Supplementary material for: Discovery of Novel Host Molecular Factors Underlying HBV/HCV Infection
Source: Front Cell Dev Biol. 2021 Aug 12;9:690882. doi: 10.3389/fcell.2021.690882 (PMC8397444; doi:10.3389/fcell.2021.690882)
Supplement: Supplementary file 3 [file Table_2.XLSX]

## Sheet: Hi-C
Supplementary Table 5. Chromatin interactions of credible sets at novel loci.
SNPs	Tissue/cell/sub-database	Bin	Distance	Bias-removed Interaction frequency	Distance normalized Interaction frequency	Gene
rs34780238	Liver	chr13:32300000-32305000	1460000	0.4	0.93	ZAR1L
rs34780238	Liver	chr13:30620000-30625000	220000	2.93	1.39	USPL1
rs34780238	Liver	chr13:29765000-29770000	1075000	0.12	0.69	UBL3
rs34780238	Liver	chr13:30425000-30430000	415000	2.33	1.52	UBE2L5
rs34780238	Liver	chr13:30930000-30935000	90000	3.46	1.02	TEX26;TEX26-AS1
rs34780238	Liver	chr13:29510000-29515000	1330000	0.47	0.95	SLC7A1
rs34780238	Liver	chr13:31735000-31740000	895000	0.34	0.79	RXFP2
rs34780238	Liver	chr13:32645000-32650000	1805000	0.11	0.78	PDS5B
rs34780238	Liver	chr13:32435000-32440000	1595000	0.4	0.95	N4BP2L2
rs34780238	Liver	chr13:32400000-32405000	1560000	0.6	1.08	N4BP2L1
rs34780238	Liver	chr13:29020000-29025000	1820000	0.08	0.76	MTUS2
rs34780238	Liver	chr13:32495000-32500000	1655000	0	0.69	MICOS10P1
rs34780238	Liver	chr13:30905000-30910000	65000	2.52	0.68	MEDAG
rs34780238	Liver	chr13:30205000-30210000	635000	0.94	1.03	KATNAL1
rs34780238	Liver	chr13:31135000-31140000	295000	1.94	1.18	HSPH1
rs34780238	Liver	chr13:30460000-30465000	380000	2.1	1.37	HMGB1
rs34780238	Liver	chr13:32030000-32035000	1190000	0.4	0.89	FRY;FRY-AS1
rs34780238	Liver	chr13:31955000-31960000	1115000	0.18	0.74	EEF1DP3
rs34780238	Liver	chr13:32315000-32320000	1475000	0.2	0.8	BRCA2
rs34780238	Liver	chr13:31200000-31205000	360000	1.46	1.07	B3GLCT
rs34780238	Liver	chr13:30710000-30715000	130000	4.14	1.42	ALOX5AP
rs142568263	Liver	chr1:212950000-212955000	1130000	0	0.64	VASH2
rs142568263	Liver	chr1:209825000-209830000	1995000	0.02	0.74	UTP25
rs142568263	Liver	chr1:211325000-211330000	495000	0.75	0.86	TRAF5
rs142568263	Liver	chr1:212790000-212795000	970000	2.02	1.85	TATDN3
rs142568263	Liver	chr1:209935000-209940000	1885000	0.33	0.95	SYT14
rs142568263	Liver	chr1:212830000-212835000	1010000	0.49	0.93	SPATA45
rs142568263	Liver	chr1:212350000-212355000	530000	2.04	1.53	SNORA16B
rs142568263	Liver	chr1:211575000-211580000	245000	1.08	0.77	SLC30A1
rs142568263	Liver	chr1:210235000-210240000	1585000	0.64	1.14	SERTAD4
rs142568263	Liver	chr1:213050000-213055000	1230000	0.25	0.82	RPS6KC1
rs142568263	Liver	chr1:212050000-212055000	230000	1.85	1.02	RPL21P28
rs142568263	Liver	chr1:211475000-211480000	345000	2.33	1.42	RD3
rs142568263	Liver	chr1:212285000-212290000	465000	1.32	1.12	PPP2R5A
rs142568263	Liver	chr1:212365000-212370000	545000	2.68	1.88	PACC1
rs142568263	Liver	chr1:212725000-212730000	905000	2.6	2.16	NSL1
rs142568263	Liver	chr1:211655000-211660000	165000	1.91	0.89	NEK2
rs142568263	Liver	chr1:211745000-211750000	75000	4.54	1.1	LPGAT1
rs142568263	Liver	chr1:210680000-210685000	1140000	0.04	0.67	KCNH1
rs142568263	Liver	chr1:211940000-211945000	120000	6	1.8	INTS7
rs142568263	Liver	chr1:210325000-210330000	1495000	0.52	1.04	HHAT
rs142568263	Liver	chr1:212855000-212860000	1035000	0.64	1.02	FLVCR1;FLVCR1-DT
rs142568263	Liver	chr1:212620000-212625000	800000	0.2	0.7	FAM71A
rs142568263	Liver	chr1:212035000-212040000	215000	4.9	2.04	DTL
rs142568263	Liver	chr1:212685000-212690000	865000	0.59	0.94	BATF3
rs142568263	Liver	chr1:212615000-212620000	795000	0.23	0.71	ATF3
rs142568263	Liver	chr1:212995000-213000000	1175000	0.22	0.79	ANGEL2
rs76561592	Liver	chr5:31795000-31800000	1560000	0.42	0.97	PDZD2
rs76561592	Liver	chr5:32225000-32230000	1990000	0.16	0.83	MTMR12
rs76561592	Liver	chr5:28925000-28930000	1310000	0.32	0.86	LSP1P3
rs76561592	Liver	chr5:32125000-32130000	1890000	0.15	0.82	GOLPH3
rs76561592	Liver	chr5:31400000-31405000	1165000	0.23	0.78	DROSHA
rs76561592	Liver	chr5:31265000-31270000	1030000	0.22	0.75	CDH6
rs76561592	Liver	chr5:31530000-31535000	1295000	0.37	0.89	C5orf22
SNPs	rsID of causal SNPs from FINEMAP.
Tissue/cell/sub-database	Tissue, cell type or sub-database of chromatin interaction data.
Bin	The other predicted end of the chromatin interaction which could be located outside of the novel loci.
Distance	The distance between two loci.
Bias-removed Interaction frequency	The interaction frequency against the genomic distance between two loci.
Distance normalized Interaction frequency	The interaction frequency against the genomic distance between two loci which is nomorlized by distance.
Gene	Genes the promoter regions of which overlapped with Bin.
Hi-C genes which also have nominally significant association with GWS SNPs at the locus are highlighted in bold.
